# Supplementary material
Source: PubMed Central journal article supplement (PMC3422474)
Supplement: cdd201227x1.pdf [file cdd201227x1.pdf]

Table1. Potential caspase cleavage sites

| position     | site   | N fragment | C fragment | frequency score | similarity maxscore | similarity maxsite | average score |
|--------------|--------|------------|------------|-----------------|---------------------|--------------------|---------------|
| 479 to 483   | TESD.G | 53.1 kD    | 86.2 kD    | 4.269           | 81.481              | TEEDG              | 347.826       |
| 684 to 688   | SEED.S | 75.9 kD    | 63.3 kD    | 3.692           | 69.565              | SESDA              | 256.829       |
| 48 to 52     | ELPD.S | 6.0 kD     | 133.2 kD   | 3.260           | 62.963              | SFPDS              | 205.229       |
| 868 to 872   | ISAD.G | 96.7 kD    | 42.6 kD    | 1.231           | 59.259              | FEADG              | 72.927        |
| 731 to 735   | SSSD.N | 81.5 kD    | 57.7 kD    | 0.931           | 69.565              | SSTDS              | 64.786        |
| 261 to 265   | TVQD.S | 30.0 kD    | 109.3 kD   | 1.048           | 56.000              | TVADG              | 58.671        |
| 1248 to 1252 | HLLD.G | 137.5 kD   | 1.8 kD     | 0.658           | 65.385              | HLADS              | 43.026        |
| 132 to 136   | WFTD.S | 15.4 kD    | 123.9 kD   | 0.299           | 81.250              | WFKDS              | 24.322        |
| 741 to 745   | EGTD.L | 82.5 kD    | 56.8 kD    | 0.306           | 69.231              | DGVDL              | 21.156        |
| 749 to 753   | DFED.N | 83.5 kD    | 55.7 kD    | 0.267           | 71.429              | DMQDN              | 19.055        |
| 752 to 756   | DNGD.R | 83.8 kD    | 55.4 kD    | 0.191           | 82.143              | DQGDR              | 15.653        |
| 707 to 711   | SRRD.S | 78.7 kD    | 60.5 kD    | 0.200           | 70.833              | AQRDS              | 14.136        |
| 61 to 65     | FSPD.R | 7.5 kD     | 131.8 kD   | 0.200           | 64.000              | ISPDS              | 12.772        |
| 508 to 512   | LEYD.R | 56.4 kD    | 82.9 kD    | 0.173           | 60.870              | LSVDR              | 10.534        |
| 814 to 818   | VIGD.G | 90.7 kD    | 48.6 kD    | 0.154           | 60.000              | TVADG              | 9.230         |
| 1255 to 1259 | SRGD.A | 138.1 kD   | 1.2 kD     | 0.133           | 60.870              | SESDA              | 8.098         |
| 1114 to 1118 | SGED.A | 123.4 kD   | 15.8 kD    | 0.150           | 52.174              | SESDA              | 7.809         |
| 213 to 217   | IPID.G | 24.5 kD    | 114.7 kD   | 0.135           | 54.167              | AAVDG              | 7.291         |
| 324 to 328   | PHQD.S | 36.8 kD    | 102.4 kD   | 0.116           | 61.290              | PHLDG              | 7.135         |
| 114 to 118   | GCLD.G | 13.3 kD    | 126.0 kD   | 0.094           | 66.667              | SALDG              | 6.267         |

Position: aa position within the sequence

Site: identified sequence

N fragment: size of N-terminal protein fragment derived from cleavage

C fragment: size of C-terminal protein fragment derived from cleavage

frequency score: indicates whether the aa of the potential cleavage site are likely to occur at that position

similarity maxscore: similarity score of the potential cleavage sites to the known cleavage sites

similarity maxsite: site from the list of known cleavage sites that is most similar to the site

average score: frequency score x similarity maxscore
