# Supplementary material
Source: PubMed Central journal article supplement (PMC3422474)

**a**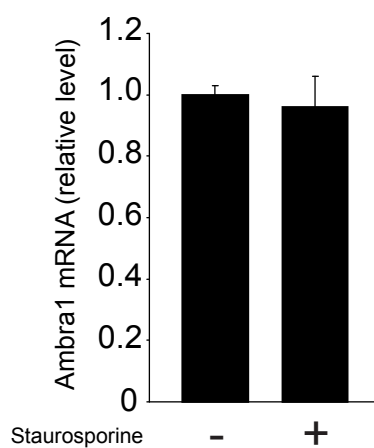**b**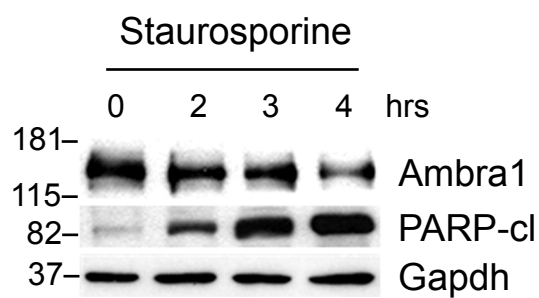**c**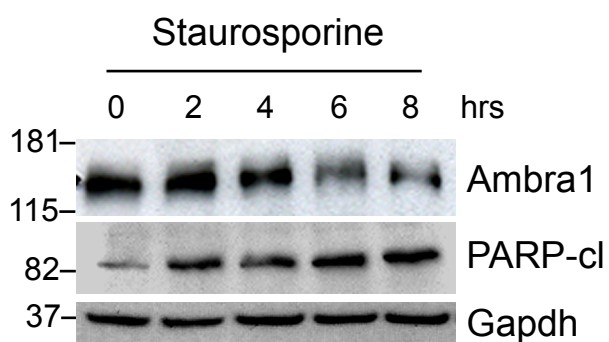**d**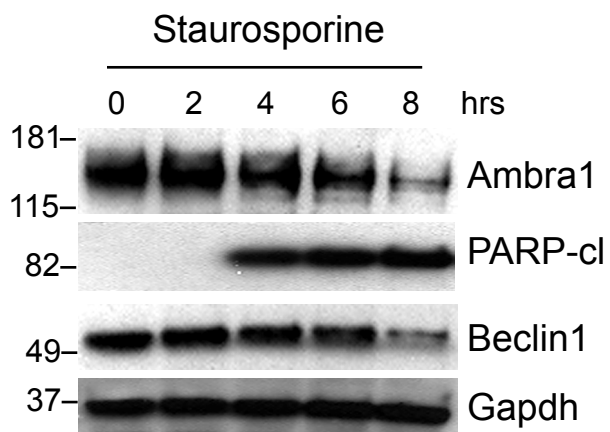**e**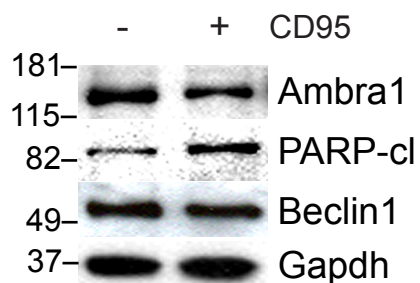

Supplement: cdd201227x2.pdf [file cdd201227x2.pdf]

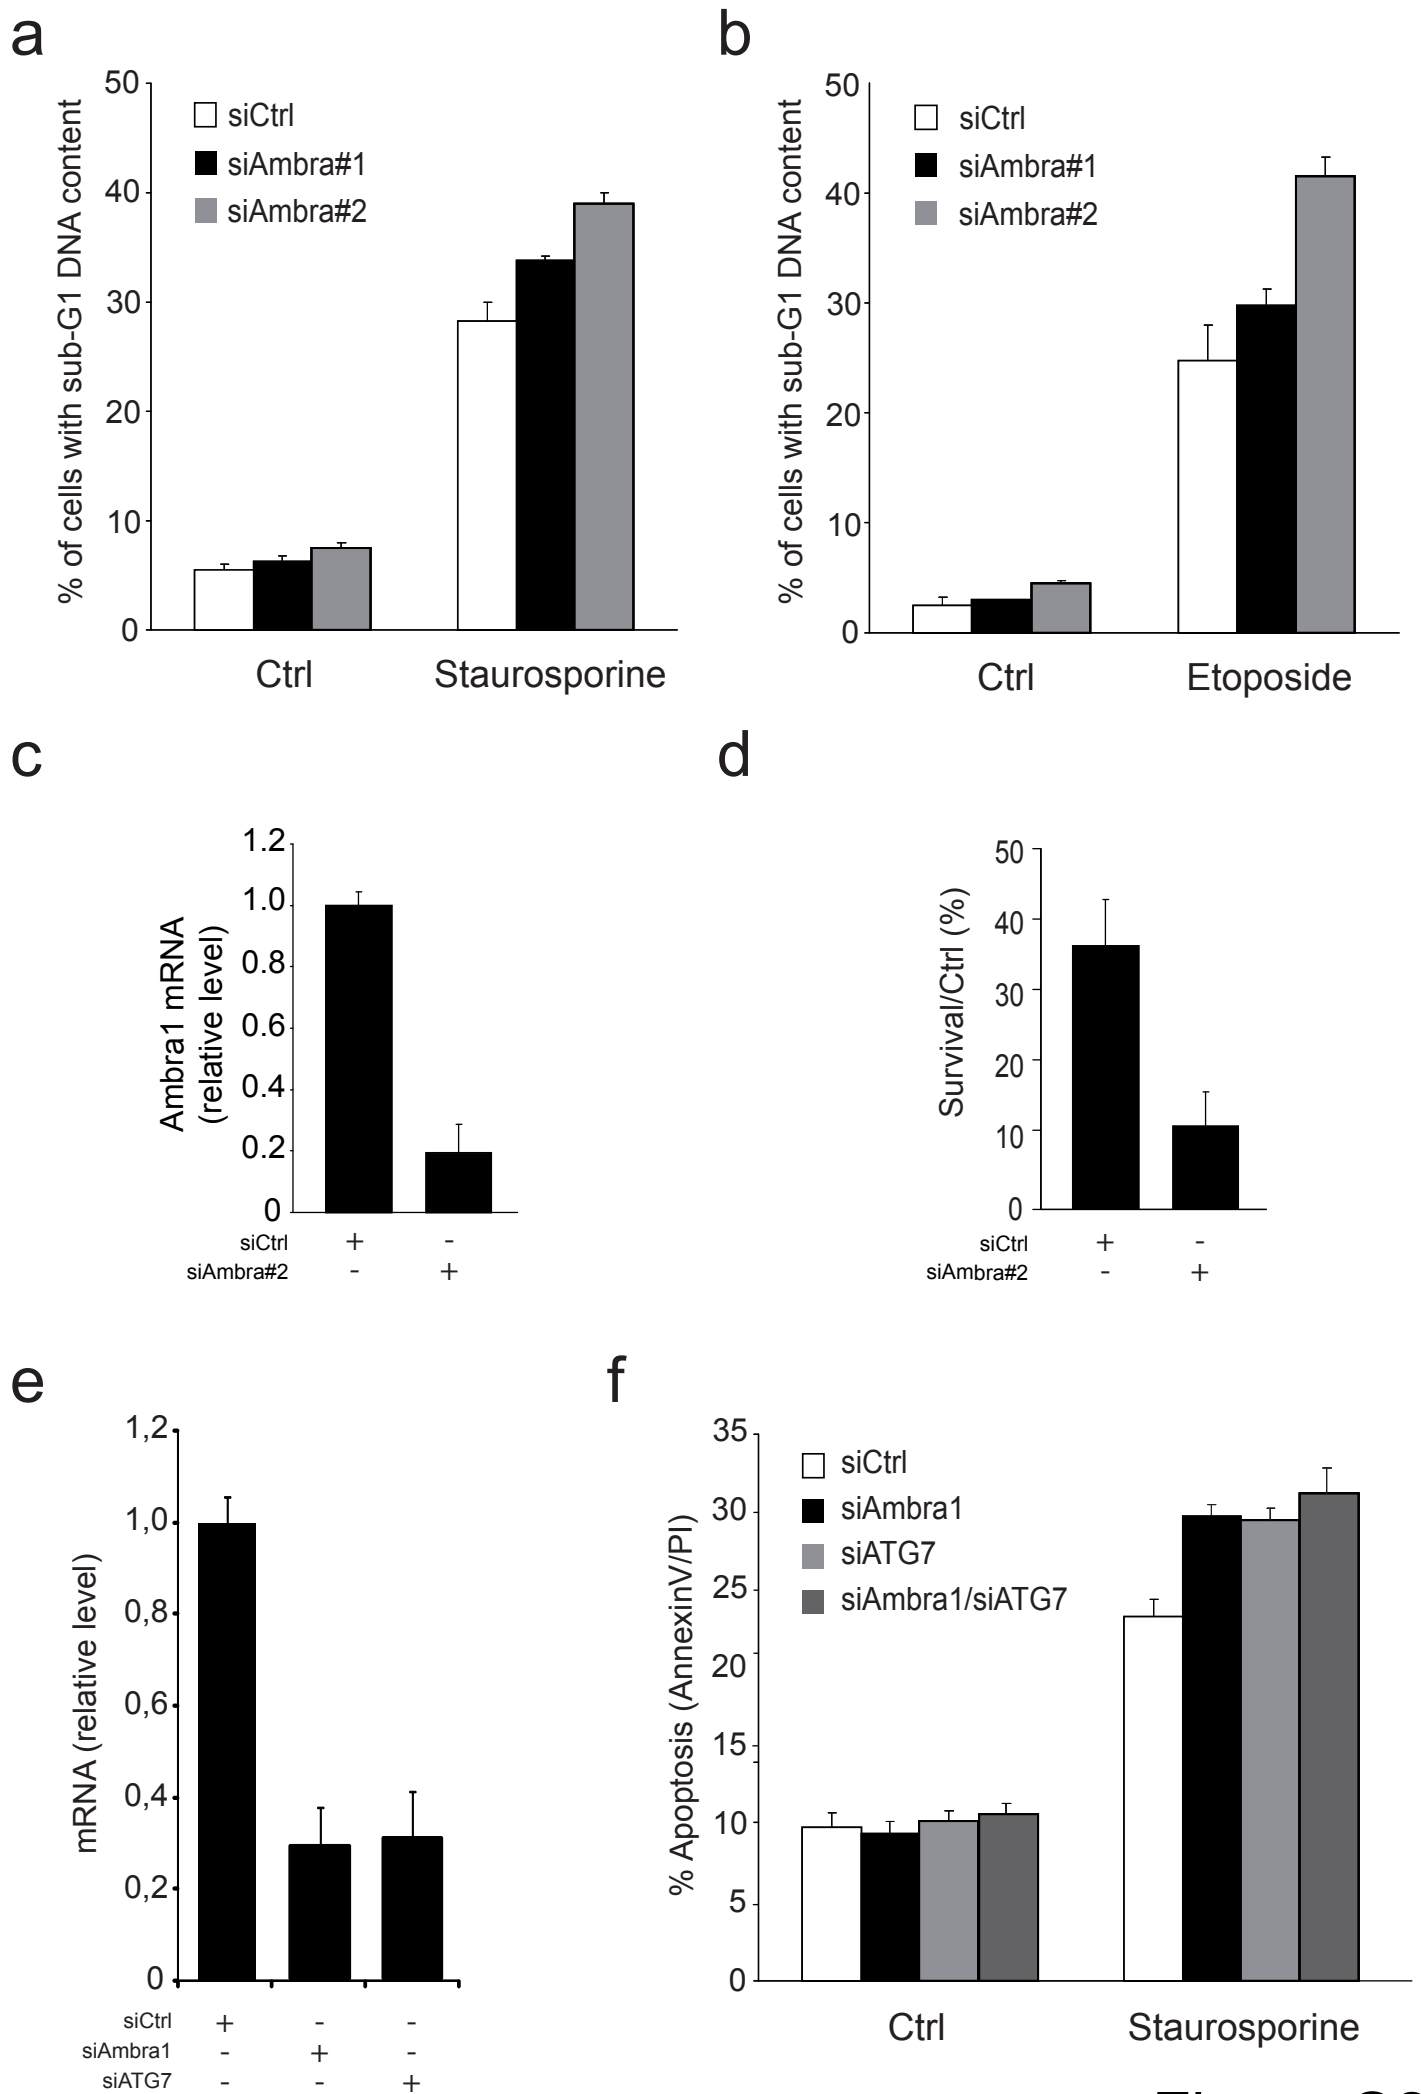

Figure S2

Supplement: cdd201227x3.pdf [file cdd201227x3.pdf]

**a**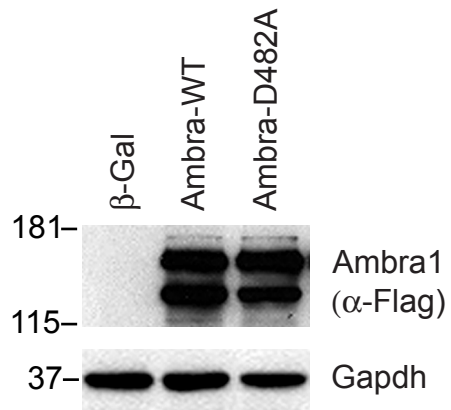**b**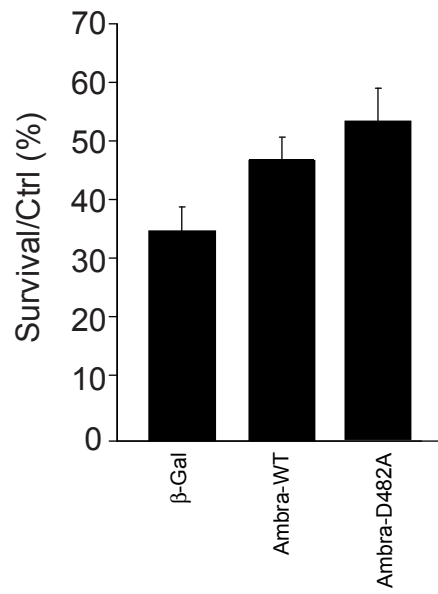**c**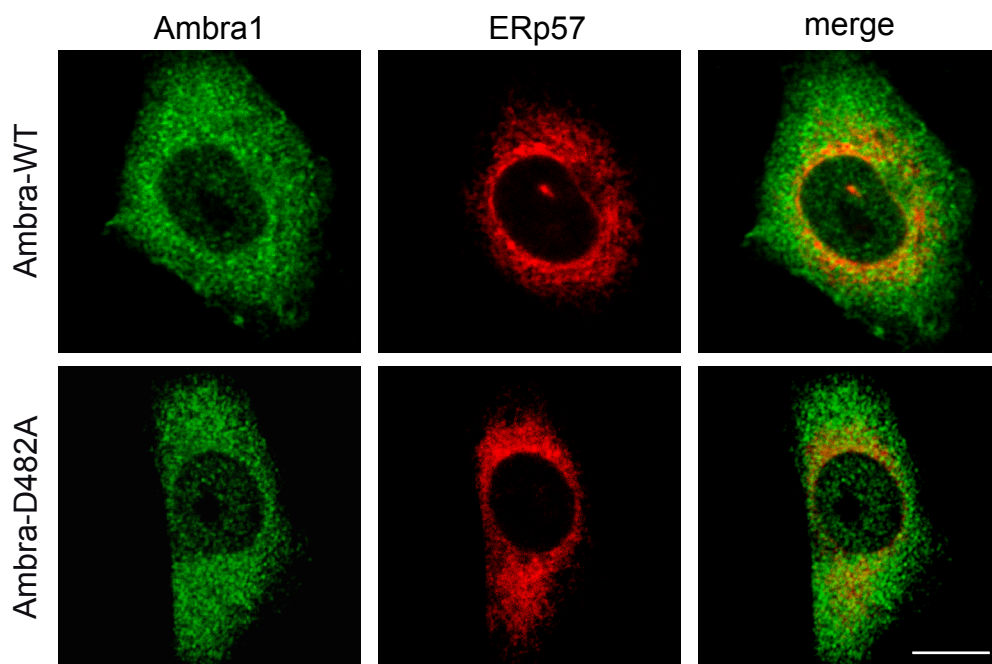**Figure S3**

Supplement: cdd201227x4.pdf [file cdd201227x4.pdf]

**a**

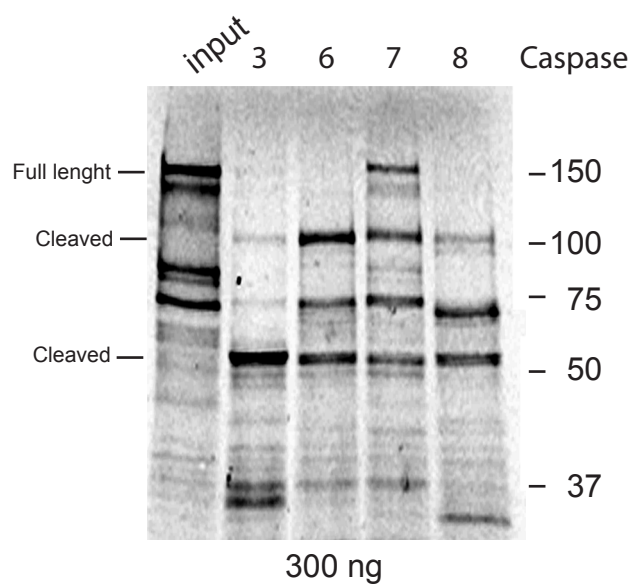

**b**

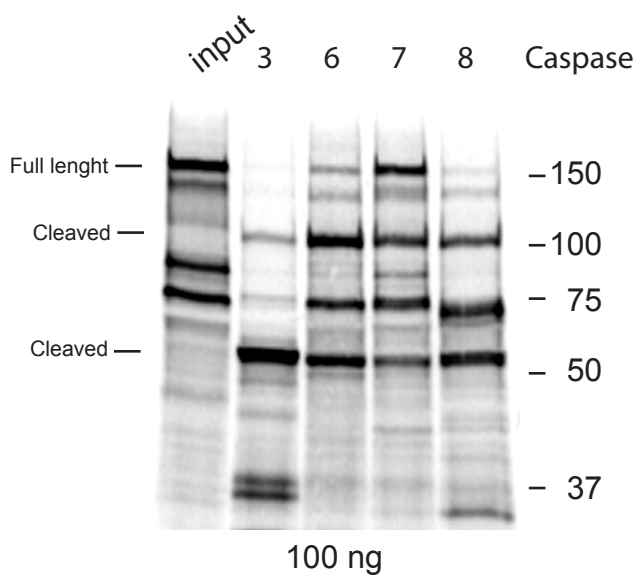

**c**

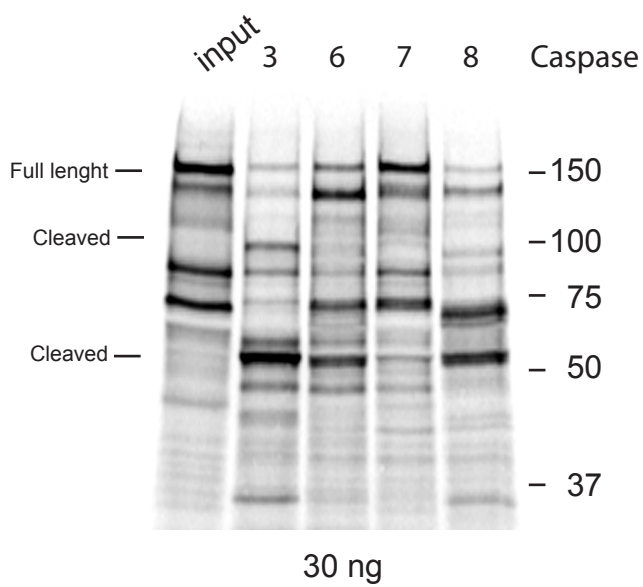

Figure S4

Supplement: cdd201227x5.pdf [file cdd201227x5.pdf]

**a**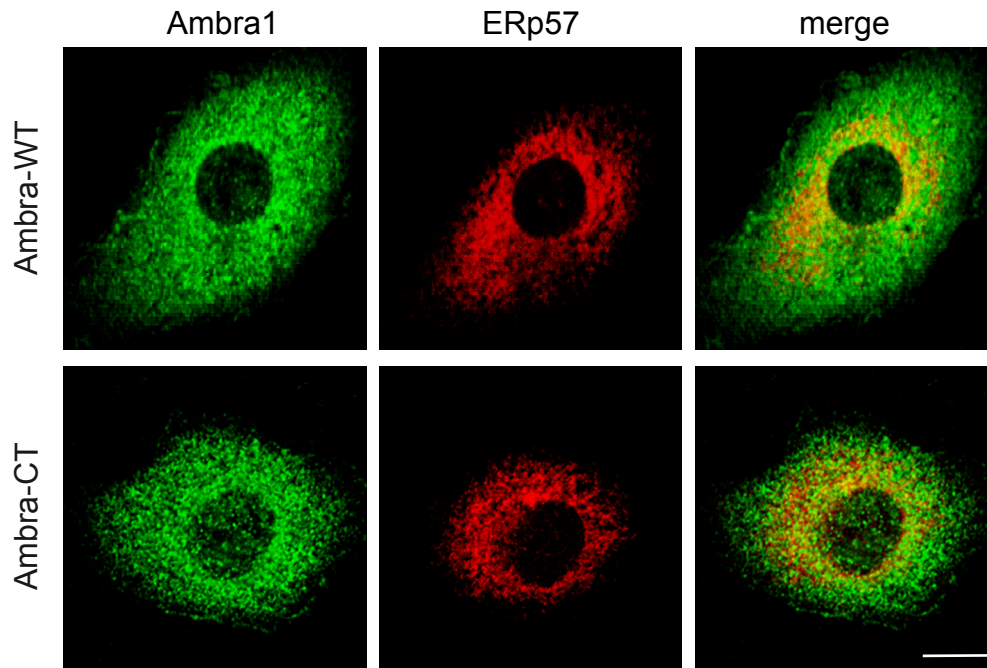**b**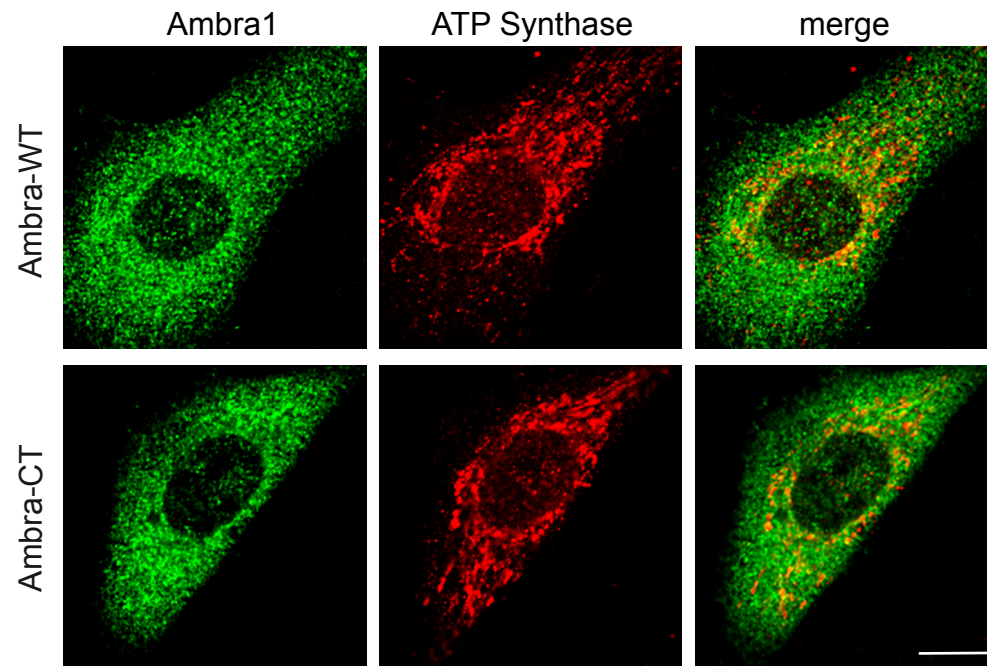**c**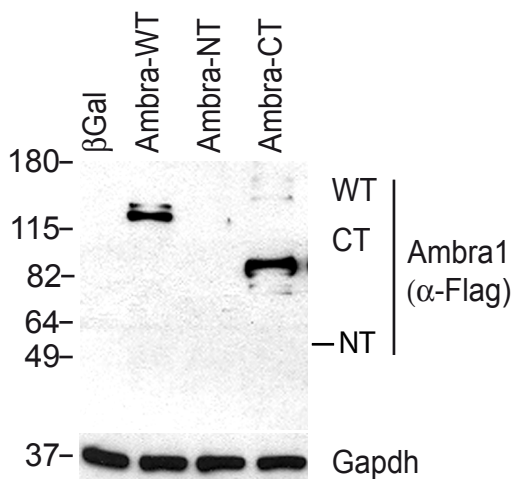**d**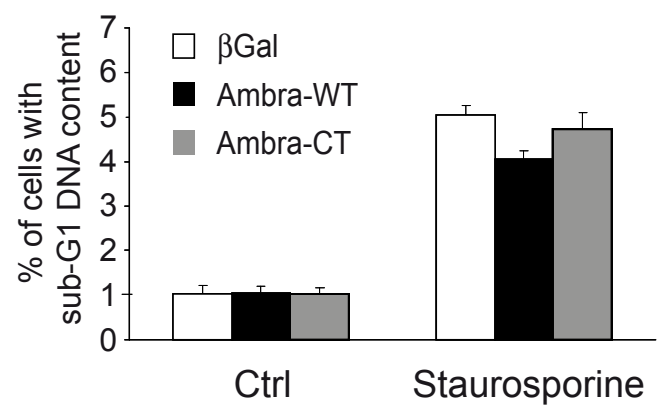**Figure S5**

Supplement: cdd201227x6.pdf [file cdd201227x6.pdf]
